# Supplementary material for: Utilization of a PNA-peptide conjugate to induce a cancer protease-responsive RNAi effect
Source: Royal Society of Chemistry journal article supplement (doi:10.1039/c5ra17737e), 2015-01-01
Supplement: c5ra17737e1.pdf [file c5ra17737e1.pdf]

## Electronic Supplementary Information

### Utilization of a PNA-peptide Conjugate to Induce a Cancer Protease-Responsive RNAi Effect

Eun Kyung Lee,<sup>a</sup> Chan Woo Kim,<sup>b</sup> Hiroyuki Kawanami,<sup>a</sup> Akihiro Kishimura<sup>abcd</sup>, Takuro Niidome,<sup>b</sup> Takeshi Mori,<sup>abc\*</sup> and Yoshiki Katayama<sup>abcde\*</sup>

<sup>a</sup>Graduate School of Systems Life Sciences, Kyushu University, 744 Motooka, Nishi-ku, Fukuoka, 819-0395, Japan.

<sup>b</sup>Department of Applied Chemistry, Faculty of Engineering, Kyushu University, 744 Motooka, Nishi-ku, Fukuoka, 819-0395, Japan.

<sup>c</sup>Center for Future Chemistry, Kyushu University, 744 Motooka, Nishi-ku, Fukuoka, 819-0395, Japan.

<sup>d</sup>International Research Center for Molecular Systems, Kyushu University, 744 Motooka, Nishi-ku, Fukuoka, 819-0395, Japan.

<sup>e</sup>Center for Advanced Medical Innovation, Kyushu University, 3-1-1 Maidashi, Higashi-ku, Fukuoka, 812-8582, Japan.

\* Corresponding author: Takeshi Mori, and Yoshiki Katayama, Department of Applied Chemistry, Faculty of Engineering, Kyushu University, 744 Motooka, Nishi-ku, Fukuoka 819-0395, Japan.

Email: mori.takeshi.880@m.kyushu-u.ac.jp; ykatatcm@mail.cstm.kyushu-u.ac.jp

Tel/Fax: +81-92-802-2850

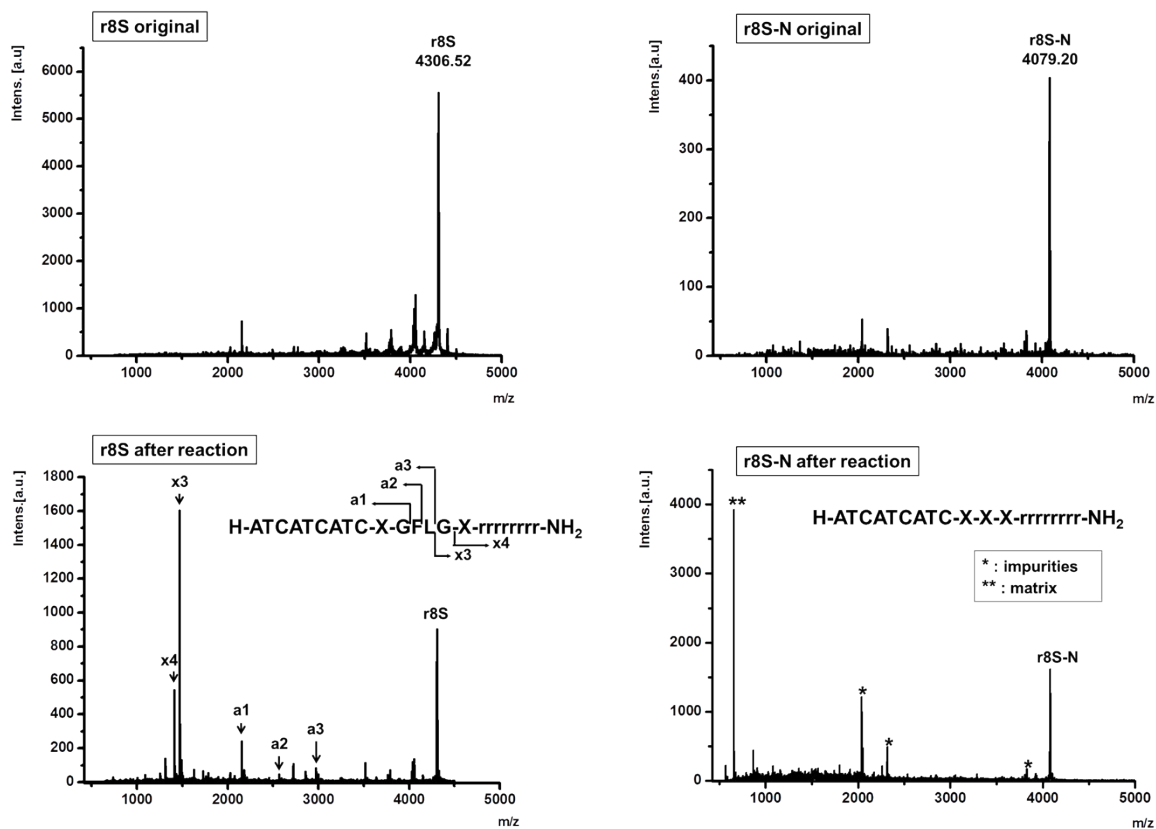

**Fig. S1** Analysis of r8S and r8S-N before and after reaction with cathepsin B by MALDI-TOF mass spectrometry

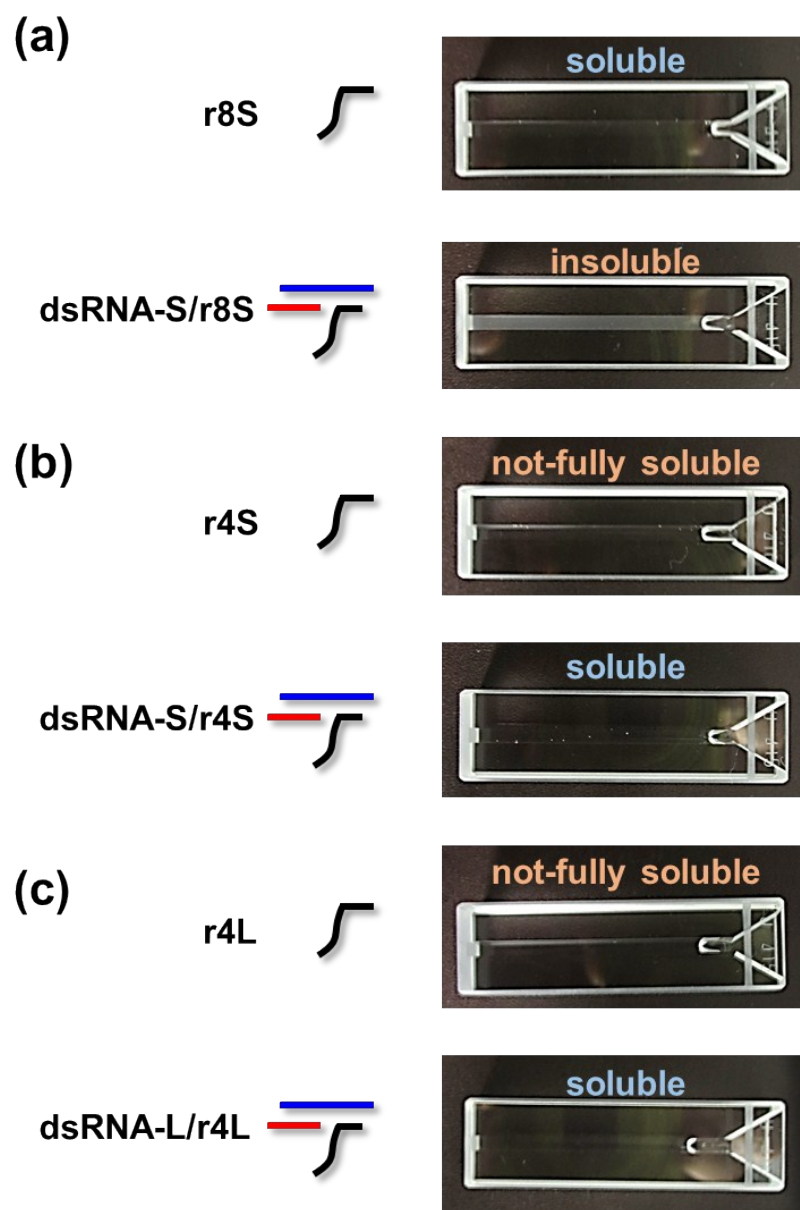

**Fig. S2** Solubility of three kinds of PNA-peptide and their hybrid with dsRNA in PBS. Concentration of PNA-peptide and dsRNA is 3  $\mu$ M, respectively.

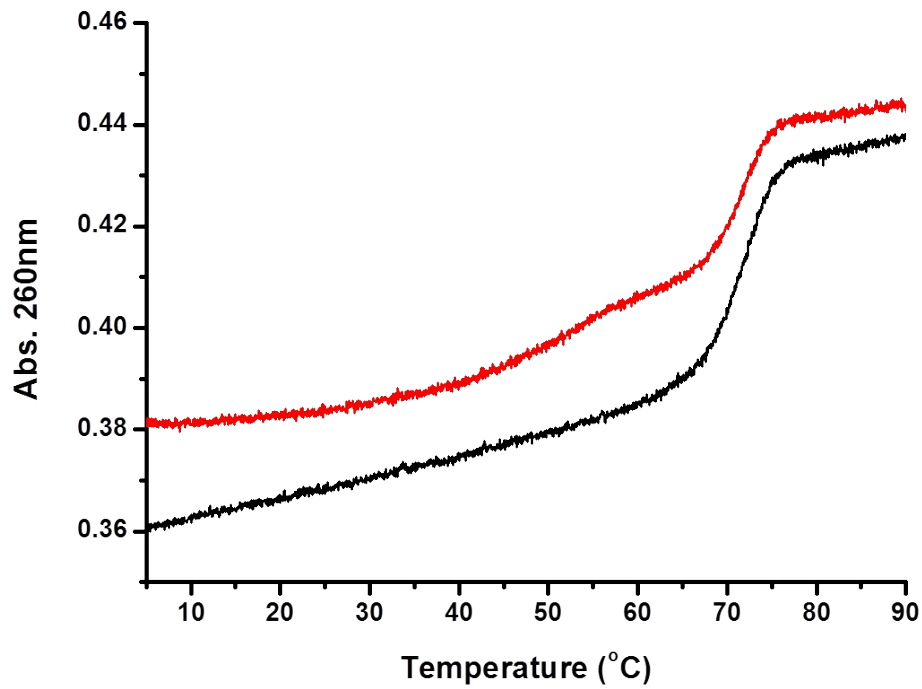

**Fig. S3** Melting curve of dsRNA (black line) and dsRNA/r4L hybrid (red line) in PBS.

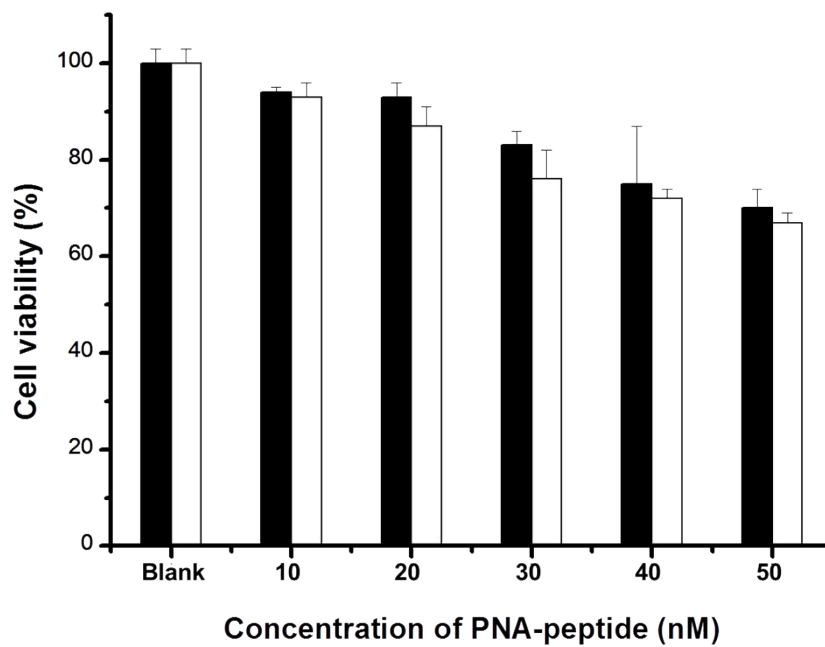

**Fig. S4** Cytotoxicity of PNA-peptide against CT-26 in the absence (filled bar) or the presence of Lipofectamine 2000 (open bar).

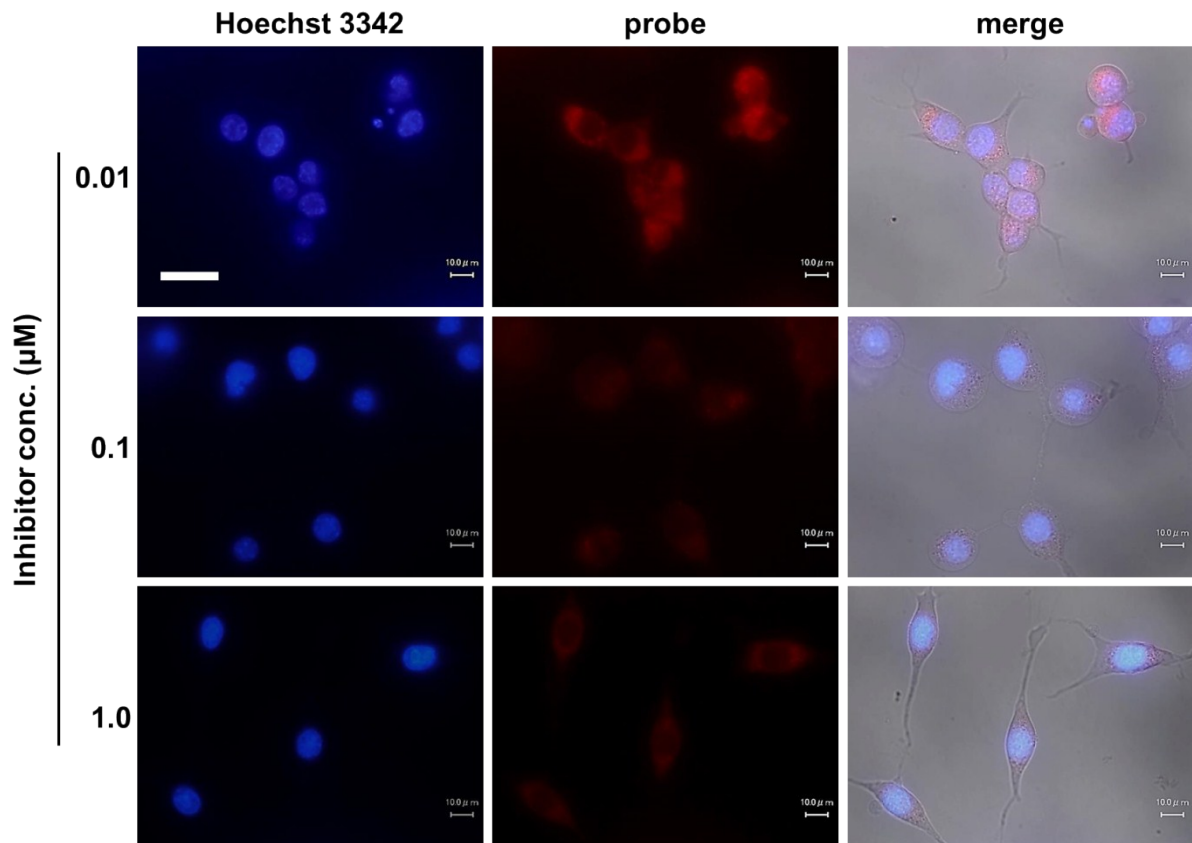

**Fig. S5** Inhibition of cathepsin B in CT-26 cells by inhibitor (CA-074 Me). Inhibitory activity was detected by fluorescent cathepsin B probe (Magic red cathepsin B substrate). The scale bar is 20 μm. Cells were treated with CA-074 Me (0.01, 0.1, 1.0 μM) for 3 h then incubated with the probe for 1 h.
